# Supplementary material
Source: PubMed Central journal article supplement (PMC1895213)
Supplement: blood_2005-03-1017_2.pdf [file blood_2005-03-1017_2.pdf]

**Liver Digest**

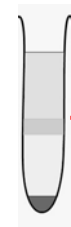

**Ficoll**

**PI**

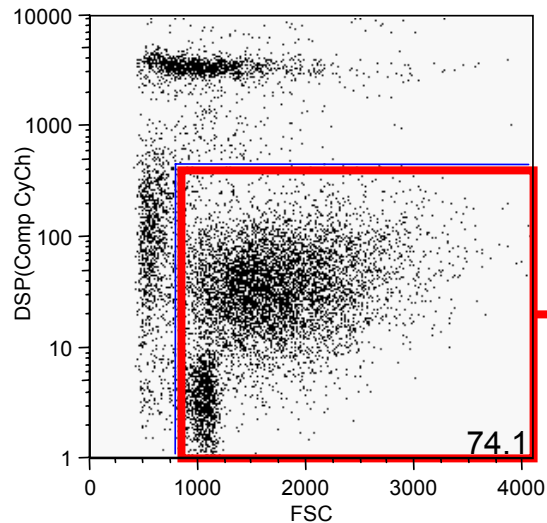

**Live Cells**

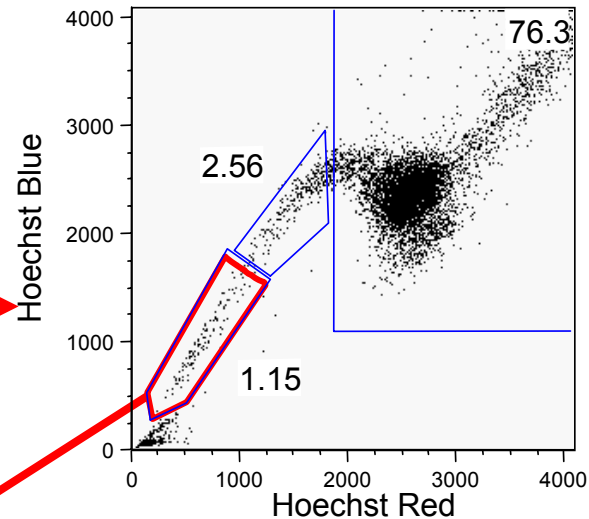

**SP tip**

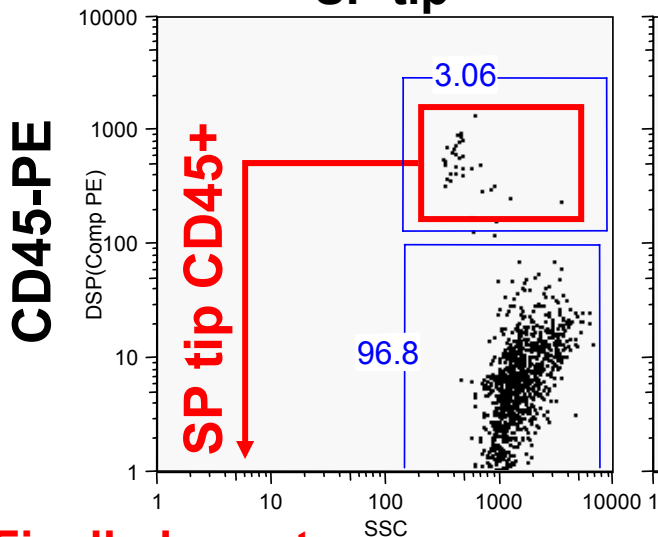

**SP shoulder**

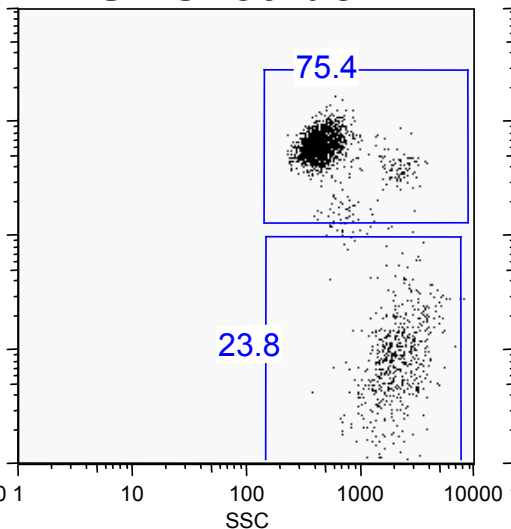

**Non-SP**

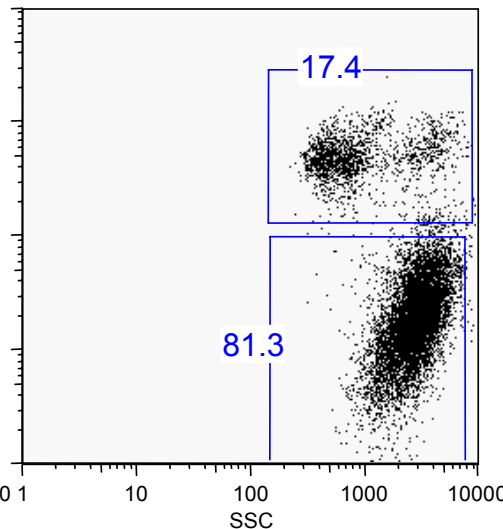

**SP tip CD45+**

**0.03% of Ficoll events;  
0.003% of total events**
